# Supplementary material for: Association of CYP26C1 Promoter Hypomethylation with Small Vessel Occlusion in Korean Subjects
Source: MDPI journal article supplement (doi:10.3390/genes12101622), 2021-10-14
Supplement: s1 [file s1]

## Supplementary Tables

**Table S1.** Different DNA methylation levels of each CpG site in the CYP26C1 promoter region between normal subjects and patients with **SVO**.

| ID     | Loci       | Transcriptional<br>start site | Normal       | <b>SVO</b>                | <i>p</i> -Value     |
|--------|------------|-------------------------------|--------------|---------------------------|---------------------|
| CpG_2  | 94,820,183 | -372                          | 0.362 ±0.069 | 0.334 ±0.071 <sup>a</sup> | 0.0335 <sup>b</sup> |
| CpG_3  | 94,820,189 | -366                          | 0.184 ±0.048 | 0.151 ±0.051              | 0.0001              |
| CpG_4  | 94,820,205 | -350                          | 0.270 ±0.052 | 0.235 ±0.064              | 0.0004              |
| CpG_5  | 94,820,209 | -346                          | 0.183 ±0.048 | 0.155 ±0.048              | 0.0005              |
| CpG_6  | 94,820,231 | -324                          | 0.135 ±0.049 | 0.116 ±0.041              | 0.0136              |
| CpG_7  | 94,820,236 | -319                          | 0.332 ±0.061 | 0.293 ±0.073              | 0.0004              |
| CpG_8  | 94,820,244 | -311                          | 0.092 ±0.034 | 0.079 ±0.037              | 0.0171              |
| CpG_9  | 94,820,257 | -298                          | 0.233 ±0.052 | 0.189 ±0.054              | <0.0001             |
| CpG_10 | 94,820,259 | -296                          | 0.157 ±0.045 | 0.128 ±0.062              | 0.0004              |
| CpG_11 | 94,820,268 | -287                          | 0.318 ±0.059 | 0.283 ±0.063              | 0.0011              |
| CpG_12 | 94,820,283 | -272                          | 0.305 ±0.058 | 0.266 ±0.071              | 0.0002              |
| CpG_13 | 94,820,289 | -266                          | 0.324 ±0.051 | 0.283 ±0.066              | <0.0001             |
| CpG_14 | 94,820,296 | -259                          | 0.343 ±0.059 | 0.306 ±0.066              | 0.0001              |
| CpG_15 | 94,820,310 | -245                          | 0.155 ±0.045 | 0.133 ±0.059              | 0.0091              |
| CpG_16 | 94,820,312 | -243                          | 0.171 ±0.047 | 0.151 ±0.062              | 0.0196              |
| CpG_17 | 94,820,318 | -237                          | 0.160 ±0.044 | 0.131 ±0.049              | 0.0003              |
| CpG_18 | 94,820,327 | -228                          | 0.287 ±0.057 | 0.256 ±0.071              | 0.0135              |
| CpG_19 | 94,820,331 | -224                          | 0.093 ±0.037 | 0.071 ±0.038              | 0.0004              |
| CpG_20 | 94,820,337 | -218                          | 0.183 ±0.056 | 0.143 ±0.063              | 0.0001              |
| CpG_21 | 94,820,341 | -214                          | 0.131 ±0.042 | 0.099 ±0.052              | 0.0001              |
| CpG_22 | 94,820,343 | -212                          | 0.113 ±0.043 | 0.098 ±0.041              | 0.0985              |
| CpG_23 | 94,820,348 | -207                          | 0.233 ±0.057 | 0.196 ±0.074              | 0.0003              |
| CpG_24 | 94,820,366 | -189                          | 0.119 ±0.039 | 0.090 ±0.049              | 0.0001              |
| CpG_25 | 94,820,371 | -184                          | 0.232 ±0.052 | 0.200 ±0.058              | 0.0004              |
| CpG_26 | 94,820,376 | -179                          | 0.159 ±0.049 | 0.128 ±0.052              | 0.0001              |

|        |            |      |              |              |         |
|--------|------------|------|--------------|--------------|---------|
| CpG_27 | 94,820,379 | -176 | 0.246 ±0.051 | 0.219 ±0.064 | 0.0039  |
| CpG_28 | 94,820,408 | -147 | 0.128 ±0.044 | 0.105 ±0.054 | 0.0030  |
| CpG_29 | 94,820,414 | -141 | 0.135 ±0.040 | 0.123 ±0.061 | 0.1480  |
| CpG_30 | 94,820,416 | -139 | 0.152 ±0.048 | 0.144 ±0.060 | 0.3393  |
| CpG_31 | 94,820,419 | -136 | 0.197 ±0.052 | 0.171 ±0.063 | 0.0038  |
| CpG_32 | 94,820,429 | -126 | 0.277 ±0.062 | 0.235 ±0.066 | <0.0001 |
| CpG_33 | 94,820,449 | -106 | 0.208 ±0.049 | 0.167 ±0.061 | <0.0001 |
| CpG_34 | 94,820,456 | -99  | 0.264 ±0.061 | 0.233 ±0.071 | 0.0021  |
| CpG_35 | 94,820,477 | -78  | 0.349 ±0.062 | 0.311 ±0.069 | 0.0011  |
| CpG_36 | 94,820,482 | -73  | 0.142 ±0.044 | 0.112 ±0.049 | 0.0006  |
| CpG_37 | 94,820,494 | -71  | 0.098 ±0.038 | 0.079 ±0.042 | 0.0050  |
| CpG_38 | 94,820,500 | -55  | 0.191 ±0.052 | 0.155 ±0.054 | 0.0001  |
| CpG_39 | 94,820,505 | -50  | 0.161 ±0.045 | 0.128 ±0.052 | 0.0002  |
| CpG_40 | 94,820,534 | -21  | 0.119 ±0.044 | 0.099 ±0.060 | 0.0280  |
| CpG_41 | 94,820,543 | -12  | 0.218 ±0.054 | 0.197 ±0.063 | 0.0425  |
| CpG_42 | 94,820,564 | +10  | 0.093 ±0.036 | 0.075 ±0.040 | 0.0011  |
| CpG_43 | 94,820,588 | +34  | 0.326 ±0.058 | 0.281 ±0.067 | 0.0001  |
| <hr/>  |            |      |              |              |         |
| Mean   |            |      | 0.204 ±0.039 | 0.175 ±0.046 | <0.0001 |

<sup>a</sup>Indicates the mean ± standard deviation. <sup>b</sup>The *p*-value was calculated by general linear model adjusted as sex, age, smoking, drinking, BMI, and WHR.

**Table S2.** Correlation between methylation level of each CpG in the CYP26C1 promoter region and blood parameters.

| ID     | Loci       | Transcriptional start site | Normal   |          |          |          |          |          |          |          | SVO      |          |          |          |          |          |          |          |
|--------|------------|----------------------------|----------|----------|----------|----------|----------|----------|----------|----------|----------|----------|----------|----------|----------|----------|----------|----------|
|        |            |                            | WBC      |          | Hct      |          | LDH      |          | Na       |          | WBC      |          | Hct      |          | LDH      |          | Na       |          |
|        |            |                            |          |          |          |          |          |          |          |          |          |          |          |          |          |          |          |          |
|        |            |                            | <i>r</i> | <i>p</i> |
| CpG_2  | 94,820,183 | -372                       | -0.198   | 0.034    | -0.162   | 0.083    | -0.145   | 0.126    | 0.232    | 0.013    | -0.231   | 0.086    | -0.114   | 0.403    | -0.268   | 0.104    | 0.324    | 0.017    |
| CpG_3  | 94,820,189 | -366                       | -0.197   | 0.035    | -0.243   | 0.009    | -0.248   | 0.008    | 0.233    | 0.012    | -0.229   | 0.090    | -0.261   | 0.052    | -0.174   | 0.297    | 0.110    | 0.429    |
| CpG_4  | 94,820,205 | -350                       | -0.156   | 0.095    | -0.102   | 0.280    | -0.087   | 0.361    | 0.075    | 0.429    | -0.192   | 0.157    | -0.094   | 0.492    | -0.173   | 0.299    | 0.320    | 0.018    |
| CpG_5  | 94,820,209 | -346                       | -0.138   | 0.141    | -0.118   | 0.210    | -0.188   | 0.046    | 0.093    | 0.323    | -0.305   | 0.022    | 0.006    | 0.964    | -0.203   | 0.222    | 0.211    | 0.125    |
| CpG_6  | 94,820,231 | -324                       | -0.085   | 0.365    | -0.083   | 0.377    | -0.223   | 0.018    | 0.168    | 0.072    | -0.333   | 0.012    | -0.245   | 0.068    | -0.418   | 0.009    | 0.155    | 0.263    |
| CpG_7  | 94,820,236 | -319                       | -0.157   | 0.095    | -0.141   | 0.132    | -0.273   | 0.003    | 0.137    | 0.144    | -0.402   | 0.002    | -0.304   | 0.023    | -0.324   | 0.047    | 0.244    | 0.075    |
| CpG_8  | 94,820,244 | -311                       | -0.061   | 0.515    | 0.047    | 0.616    | -0.221   | 0.019    | 0.136    | 0.149    | -0.183   | 0.177    | -0.360   | 0.006    | -0.094   | 0.575    | 0.083    | 0.550    |
| CpG_9  | 94,820,257 | -298                       | -0.249   | 0.007    | -0.032   | 0.738    | -0.118   | 0.213    | 0.150    | 0.110    | -0.319   | 0.017    | -0.122   | 0.369    | -0.144   | 0.387    | 0.141    | 0.311    |
| CpG_10 | 94,820,259 | -296                       | -0.337   | 0.000    | -0.111   | 0.238    | -0.208   | 0.027    | 0.094    | 0.315    | -0.274   | 0.041    | -0.168   | 0.215    | -0.362   | 0.025    | 0.245    | 0.074    |
| CpG_11 | 94,820,268 | -287                       | -0.251   | 0.007    | -0.178   | 0.058    | -0.075   | 0.430    | 0.048    | 0.612    | -0.372   | 0.005    | -0.097   | 0.478    | -0.399   | 0.013    | 0.175    | 0.205    |
| CpG_12 | 94,820,283 | -272                       | -0.274   | 0.003    | -0.242   | 0.009    | -0.189   | 0.045    | 0.206    | 0.028    | -0.368   | 0.005    | -0.021   | 0.878    | -0.203   | 0.221    | 0.255    | 0.063    |
| CpG_13 | 94,820,289 | -266                       | -0.221   | 0.018    | -0.054   | 0.570    | -0.214   | 0.023    | 0.103    | 0.273    | -0.393   | 0.003    | -0.037   | 0.787    | -0.258   | 0.118    | 0.300    | 0.027    |

|        |            |      |        |       |        |       |        |       |       |       |        |       |        |       |        |       |       |       |
|--------|------------|------|--------|-------|--------|-------|--------|-------|-------|-------|--------|-------|--------|-------|--------|-------|-------|-------|
| CpG_14 | 94,820,296 | -259 | -0.174 | 0.063 | -0.105 | 0.263 | -0.274 | 0.003 | 0.165 | 0.079 | -0.328 | 0.014 | -0.144 | 0.290 | -0.266 | 0.106 | 0.209 | 0.130 |
| CpG_15 | 94,820,310 | -245 | -0.245 | 0.008 | -0.151 | 0.108 | -0.279 | 0.003 | 0.225 | 0.016 | -0.361 | 0.006 | -0.265 | 0.049 | -0.173 | 0.300 | 0.358 | 0.008 |
| CpG_16 | 94,820,312 | -243 | -0.173 | 0.064 | -0.188 | 0.045 | -0.369 | 0.000 | 0.316 | 0.001 | -0.309 | 0.021 | -0.094 | 0.490 | -0.213 | 0.199 | 0.202 | 0.143 |
| CpG_17 | 94,820,318 | -237 | -0.225 | 0.016 | -0.197 | 0.034 | -0.176 | 0.062 | 0.111 | 0.239 | -0.404 | 0.002 | -0.215 | 0.112 | -0.335 | 0.040 | 0.191 | 0.166 |
| CpG_18 | 94,820,327 | -228 | -0.268 | 0.004 | -0.256 | 0.006 | -0.116 | 0.221 | 0.084 | 0.374 | -0.326 | 0.014 | -0.207 | 0.126 | -0.357 | 0.028 | 0.366 | 0.006 |
| CpG_19 | 94,820,331 | -224 | -0.320 | 0.000 | -0.182 | 0.052 | -0.246 | 0.009 | 0.084 | 0.374 | -0.238 | 0.078 | -0.012 | 0.932 | -0.208 | 0.211 | 0.131 | 0.347 |
| CpG_20 | 94,820,337 | -218 | -0.260 | 0.005 | -0.215 | 0.021 | -0.139 | 0.141 | 0.130 | 0.165 | -0.291 | 0.029 | -0.228 | 0.091 | -0.284 | 0.084 | 0.129 | 0.354 |
| CpG_21 | 94,820,341 | -214 | -0.224 | 0.016 | -0.130 | 0.167 | -0.113 | 0.232 | 0.110 | 0.244 | -0.200 | 0.139 | -0.227 | 0.093 | -0.151 | 0.365 | 0.167 | 0.228 |
| CpG_22 | 94,820,343 | -212 | -0.127 | 0.175 | -0.156 | 0.095 | -0.211 | 0.025 | 0.192 | 0.040 | -0.172 | 0.204 | -0.212 | 0.116 | -0.393 | 0.015 | 0.225 | 0.103 |
| CpG_23 | 94,820,348 | -207 | -0.190 | 0.042 | -0.191 | 0.041 | -0.143 | 0.132 | 0.208 | 0.026 | -0.229 | 0.090 | -0.168 | 0.215 | -0.356 | 0.028 | 0.179 | 0.196 |
| CpG_24 | 94,820,366 | -189 | -0.198 | 0.034 | -0.071 | 0.450 | -0.222 | 0.018 | 0.192 | 0.040 | -0.297 | 0.026 | -0.307 | 0.021 | -0.310 | 0.058 | 0.163 | 0.238 |
| CpG_25 | 94,820,371 | -184 | -0.181 | 0.053 | -0.179 | 0.056 | -0.206 | 0.028 | 0.145 | 0.121 | -0.341 | 0.010 | -0.122 | 0.369 | -0.320 | 0.050 | 0.298 | 0.029 |
| CpG_26 | 94,820,376 | -179 | -0.209 | 0.025 | -0.075 | 0.425 | -0.100 | 0.293 | 0.154 | 0.100 | -0.291 | 0.029 | -0.210 | 0.119 | -0.286 | 0.082 | 0.074 | 0.593 |
| CpG_27 | 94,820,379 | -176 | -0.174 | 0.062 | -0.110 | 0.240 | -0.111 | 0.241 | 0.130 | 0.167 | -0.244 | 0.070 | -0.144 | 0.288 | -0.326 | 0.045 | 0.226 | 0.101 |
| CpG_28 | 94,820,408 | -147 | -0.256 | 0.006 | -0.189 | 0.043 | -0.138 | 0.146 | 0.117 | 0.211 | -0.188 | 0.164 | -0.163 | 0.229 | -0.126 | 0.451 | 0.139 | 0.315 |
| CpG_29 | 94,820,414 | -141 | -0.254 | 0.006 | -0.161 | 0.086 | -0.136 | 0.152 | 0.133 | 0.157 | -0.333 | 0.012 | -0.243 | 0.071 | -0.316 | 0.054 | 0.079 | 0.569 |
| CpG_30 | 94,820,416 | -139 | -0.182 | 0.051 | -0.168 | 0.072 | -0.113 | 0.235 | 0.152 | 0.106 | -0.327 | 0.014 | -0.279 | 0.037 | -0.236 | 0.154 | 0.105 | 0.449 |

|         |            |      |        |       |        |       |        |       |       |       |        |       |        |       |        |       |        |       |
|---------|------------|------|--------|-------|--------|-------|--------|-------|-------|-------|--------|-------|--------|-------|--------|-------|--------|-------|
| CpG_31  | 94,820,419 | -136 | -0.165 | 0.077 | -0.151 | 0.108 | -0.237 | 0.011 | 0.211 | 0.024 | -0.388 | 0.003 | -0.280 | 0.037 | -0.257 | 0.119 | 0.128  | 0.355 |
| CpG_32  | 94,820,429 | -126 | -0.272 | 0.003 | -0.152 | 0.106 | -0.157 | 0.097 | 0.108 | 0.251 | -0.317 | 0.017 | -0.205 | 0.129 | -0.247 | 0.134 | 0.110  | 0.429 |
| CpG_33  | 94,820,449 | -106 | -0.189 | 0.043 | -0.064 | 0.495 | -0.249 | 0.008 | 0.150 | 0.110 | -0.265 | 0.049 | -0.147 | 0.280 | -0.157 | 0.346 | 0.038  | 0.783 |
| CpG_34  | 94,820,456 | -99  | -0.169 | 0.071 | -0.133 | 0.155 | -0.162 | 0.086 | 0.069 | 0.466 | -0.276 | 0.039 | -0.169 | 0.213 | -0.393 | 0.015 | 0.170  | 0.220 |
| CpG_35  | 94,820,477 | -78  | -0.219 | 0.019 | -0.195 | 0.037 | -0.043 | 0.652 | 0.076 | 0.421 | -0.360 | 0.006 | -0.347 | 0.009 | -0.307 | 0.061 | 0.118  | 0.394 |
| CpG_36  | 94,820,482 | -73  | -0.291 | 0.002 | -0.226 | 0.015 | -0.124 | 0.191 | 0.196 | 0.036 | -0.381 | 0.004 | -0.183 | 0.176 | -0.306 | 0.062 | 0.135  | 0.332 |
| CpG_37  | 94,820,494 | -71  | -0.254 | 0.006 | -0.087 | 0.358 | -0.151 | 0.110 | 0.184 | 0.049 | -0.302 | 0.023 | -0.080 | 0.558 | -0.084 | 0.615 | 0.042  | 0.763 |
| CpG_38  | 94,820,500 | -55  | -0.234 | 0.012 | -0.157 | 0.093 | -0.186 | 0.048 | 0.107 | 0.253 | -0.303 | 0.023 | -0.308 | 0.021 | -0.312 | 0.057 | 0.253  | 0.065 |
| CpG_39  | 94,820,505 | -50  | -0.252 | 0.007 | -0.293 | 0.002 | -0.172 | 0.068 | 0.190 | 0.042 | -0.324 | 0.015 | -0.335 | 0.012 | -0.229 | 0.166 | 0.111  | 0.425 |
| CpG_40  | 94,820,534 | -21  | -0.185 | 0.048 | -0.099 | 0.293 | -0.146 | 0.122 | 0.250 | 0.007 | -0.246 | 0.068 | -0.276 | 0.039 | -0.305 | 0.062 | 0.171  | 0.216 |
| CpG_41  | 94,820,543 | -12  | -0.117 | 0.213 | -0.171 | 0.068 | -0.013 | 0.889 | 0.063 | 0.503 | -0.329 | 0.013 | -0.446 | 0.001 | -0.298 | 0.069 | 0.215  | 0.118 |
| CpG_42  | 94,820,564 | +10  | -0.243 | 0.009 | -0.005 | 0.954 | -0.247 | 0.008 | 0.115 | 0.221 | -0.286 | 0.032 | -0.301 | 0.024 | -0.236 | 0.154 | -0.031 | 0.823 |
| CpG_43  | 94,820,588 | +34  | -0.218 | 0.019 | -0.241 | 0.009 | -0.146 | 0.123 | 0.197 | 0.035 | -0.145 | 0.288 | -0.138 | 0.310 | -0.303 | 0.064 | 0.042  | 0.765 |
| Average |            |      | -0.270 | 0.004 | -0.193 | 0.039 | -0.221 | 0.019 | 0.191 | 0.041 | -0.377 | 0.004 | -0.247 | 0.066 | -0.334 | 0.040 | 0.228  | 0.098 |

The  $p$ -value was calculated by binary person's correlation.

**Table S3.** Predictive binding sites of transcription factors in the CYP26C1 promoter region.

| Transcription Factor | position from<br>transcription start site |                 | String     | Dissimilarity (%) |
|----------------------|-------------------------------------------|-----------------|------------|-------------------|
|                      | Start<br>position                         | End<br>position |            |                   |
| GR-alpha [T00337]    | -396                                      | -392            | AAAGG      | 0.21              |
| AP-2alphaA [T00035]  | -396                                      | -391            | AAAGGC     | 5.10              |
| GR-alpha [T00337]    | -389                                      | -385            | CCTAG      | 8.07              |
| GR-alpha [T00337]    | -379                                      | -375            | CGAGG      | 8.28              |
| Sp1 [T00759]         | -377                                      | -368            | AGGGCGGGGA | 1.39              |
| Pax-5 [T00070]       | -376                                      | -370            | GGGCGGG    | 1.54              |
| p53 [T00671]         | -376                                      | -370            | GGGCGGG    | 3.38              |
| E2F-1 [T01542]       | -374                                      | -367            | GCGGGGAC   | 9.03              |
| TFII-I [T00824]      | -370                                      | -365            | GGACGG     | 9.51              |
| GR-alpha [T00337]    | -363                                      | -359            | AGAGG      | 0.21              |
| RXR-alpha [T01345]   | -344                                      | -338            | GGGTGGG    | 5.27              |
| Pax-5 [T00070]       | -340                                      | -334            | GGGCCAG    | 1.54              |
| p53 [T00671]         | -340                                      | -334            | GGGCCAG    | 4.34              |
| GR-alpha [T00337]    | -337                                      | -333            | CCAGG      | 8.07              |
| Pax-5 [T00070]       | -323                                      | -317            | GGGCGCA    | 9.55              |
| p53 [T00671]         | -323                                      | -317            | GGGCGCA    | 6.40              |
| C/EBPbeta [T00581]   | -319                                      | -316            | GCAA       | 0.00              |
| Pax-5 [T00070]       | -318                                      | -312            | CAAGCCC    | 0.00              |
| p53 [T00671]         | -318                                      | -312            | CAAGCCC    | 3.75              |
| c-Jun [T00133]       | -312                                      | -306            | CGGGTCA    | 7.18              |

|                     |      |      |                   |      |
|---------------------|------|------|-------------------|------|
| RXR-alpha [T01345]  | -311 | -305 | GGGTCAG           | 1.70 |
| ER-alpha [T00261]   | -310 | -306 | GGTCA             | 0.00 |
| c-Myb [T00137]      | -309 | -302 | GTCAGTTC          | 4.75 |
| GCF [T00320]        | -305 | -297 | GTTCTGCGC         | 7.19 |
| FOXP3 [T04280]      | -305 | -300 | GTTCTG            | 9.51 |
| FOXP3 [T04280]      | -296 | -291 | GTTGGG            | 9.51 |
| C/EBPbeta [T00581]  | -295 | -292 | TTGG              | 1.64 |
| RAR-beta [T00721]   | -294 | -285 | TGGGTTCGCC        | 2.14 |
| RXR-alpha [T01345]  | -293 | -287 | GGGTTCG           | 0.85 |
| p53 [T00671]        | -290 | -284 | TTCGCCC           | 5.35 |
| Egr-3 [T00243]      | -290 | -278 | TTCGCCCACTTT<br>C | 6.82 |
| TFIID [T00820]      | -281 | -275 | TTTCTGA           | 8.01 |
| AP-2alphaA [T00035] | -272 | -267 | GCCTGC            | 0.00 |
| GR-alpha [T00337]   | -271 | -267 | CCTGC             | 8.07 |
| E2F-1 [T01542]      | -261 | -254 | GCGGGGAA          | 5.48 |
| RelA [T00594]       | -260 | -250 | CGGGGAAGCTC       | 4.91 |
| NF-kappaB [T00590]  | -259 | -248 | GGGGAAGCTCTG      | 9.71 |
| NF-kappaB1 [T00593] | -259 | -249 | GGGGAAGCTCT       | 2.90 |
| c-Ets-1 [T00112]    | -259 | -253 | GGGGAAG           | 5.56 |
| STAT4 [T01577]      | -257 | -252 | GGAAGC            | 4.41 |
| E2F [T00221]        | -251 | -242 | TCTGGCGCGA        | 9.24 |
| ENKTF-1 [T00255]    | -249 | -242 | TGGCGCGA          | 6.94 |
| RAR-beta [T00721]   | -246 | -237 | CGCGAACCCG        | 5.39 |

|                     |      |      |             |      |
|---------------------|------|------|-------------|------|
| RXR-alpha [T01345]  | -244 | -238 | CGAACCC     | 0.85 |
| GR-alpha [T00337]   | -237 | -233 | GCAGG       | 8.07 |
| AP-2alphaA [T00035] | -237 | -232 | GCAGGC      | 0.00 |
| Pax-5 [T00070]      | -236 | -230 | CAGGCCC     | 0.00 |
| p53 [T00671]        | -236 | -230 | CAGGCCC     | 4.13 |
| Sp1 [T00759]        | -233 | -224 | GCCCCGCCCCG | 0.95 |
| Pax-5 [T00070]      | -231 | -225 | CCCGCCC     | 1.54 |
| p53 [T00671]        | -231 | -225 | CCCGCCC     | 3.38 |
| GR-alpha [T00337]   | -225 | -221 | CGAGG       | 8.28 |
| ETF [T00270]        | -218 | -208 | GCTCGCGGGGC | 7.87 |
| Pax-5 [T00070]      | -211 | -205 | GGGCGAG     | 3.08 |
| p53 [T00671]        | -211 | -205 | GGGCGAG     | 3.59 |
| Pax-5 [T00070]      | -208 | -202 | CGAGCCC     | 0.00 |
| p53 [T00671]        | -208 | -202 | CGAGCCC     | 5.02 |
| ETF [T00270]        | -205 | -195 | GCCCCCAGCCC | 5.25 |
| Pax-5 [T00070]      | -201 | -195 | CCAGCCC     | 0.00 |
| p53 [T00671]        | -201 | -195 | CCAGCCC     | 3.75 |
| Sp1 [T00759]        | -189 | -180 | GAGCCGCCCC  | 3.38 |
| Pax-5 [T00070]      | -187 | -181 | GCCGCCC     | 9.55 |
| p53 [T00671]        | -187 | -181 | GCCGCCC     | 6.19 |
| GCF [T00320]        | -183 | -175 | CCCCGGCGC   | 1.07 |
| AP-2alphaA [T00035] | -176 | -171 | GCCTGC      | 0.00 |
| GR-alpha [T00337]   | -175 | -171 | CCTGC       | 8.07 |
| TFII-I [T00824]     | -170 | -165 | CACTCC      | 6.58 |



|                     |      |      |             |      |
|---------------------|------|------|-------------|------|
| GR-alpha [T00337]   | -165 | -161 | CCTAC       | 8.07 |
| Pax-5 [T00070]      | -158 | -152 | AGAGCCC     | 4.01 |
| p53 [T00671]        | -158 | -152 | AGAGCCC     | 8.54 |
| GR-alpha [T00337]   | -152 | -148 | CCTCC       | 8.28 |
| GCF [T00320]        | -141 | -133 | GCGCCGCTG   | 6.99 |
| Pax-5 [T00070]      | -136 | -130 | GCTGCCC     | 8.01 |
| p53 [T00671]        | -136 | -130 | GCTGCCC     | 2.81 |
| AP-2alphaA [T00035] | -126 | -121 | GCCTCC      | 1.87 |
| GR-alpha [T00337]   | -125 | -121 | CCTCC       | 8.28 |
| NF-Y [T00150]       | -125 | -118 | CCTCCAAT    | 5.09 |
| C/EBPalpha [T00105] | -123 | -117 | TCCAATC     | 5.57 |
| C/EBPbeta [T00581]  | -122 | -119 | CCAA        | 1.64 |
| NFI/CTF [T00094]    | -122 | -115 | CCAATCAC    | 5.56 |
| GR-beta [T01920]    | -120 | -116 | AATCA       | 4.20 |
| T3R-beta1 [T00851]  | -118 | -110 | TCACCACTC   | 3.37 |
| MEF-2A [T01005]     | -100 | -90  | CGCTTTAAATA | 9.22 |
| HNF-3alpha [T02512] | -97  | -90  | TTTAAATA    | 4.84 |
| GR-beta [T01920]    | -93  | -89  | AATAT       | 3.36 |
| LEF-1 [T02905]      | -90  | -83  | ATGCAAAG    | 8.76 |
| TCF-4E [T02878]     | -89  | -83  | TGCAAAG     | 3.15 |
| C/EBPbeta [T00581]  | -88  | -85  | GCAA        | 0.00 |
| GR [T05076]         | -87  | -81  | CAAAGAC     | 5.21 |
| CREB [T00163]       | -83  | -75  | GACACGTCA   | 3.81 |
| ATF-2 [T00167]      | -83  | -74  | GACACGTCAC  | 2.80 |

|                             |     |     |              |      |
|-----------------------------|-----|-----|--------------|------|
| c-Jun [T00133]              | -81 | -75 | CACGTCA      | 9.01 |
| FOXP3 [T04280]              | -73 | -68 | GTTGTG       | 0.00 |
| C/EBPbeta [T00581]          | -72 | -69 | TTGT         | 0.00 |
| VDR [T00885]                | -71 | -63 | TGTGTGAAC    | 4.62 |
| PXR-1:RXR-alpha<br>[T05671] | -67 | -60 | TGAACCGG     | 4.21 |
| TFII-I [T00824]             | -60 | -55 | GGATCG       | 9.51 |
| TFII-I [T00824]             | -56 | -51 | CGGTCC       | 9.51 |
| GR-alpha [T00337]           | -50 | -46 | GTAGG        | 8.07 |
| NF-1 [T00539]               | -42 | -35 | GGAGCCAA     | 6.95 |
| CTF [T00174]                | -41 | -30 | GAGCCAATATCT | 7.45 |
| NF-Y [T00150]               | -41 | -34 | GAGCCAAT     | 2.13 |
| C/EBPalpha [T00105]         | -39 | -33 | GCCAATA      | 5.78 |
| C/EBPbeta [T00581]          | -38 | -35 | CCAA         | 1.64 |
| GATA-2 [T00308]             | -38 | -30 | CCAATATCT    | 7.78 |
| GR-beta [T01920]            | -36 | -32 | AATAT        | 3.36 |
| GATA-1 [T00306]             | -34 | -29 | TATCTA       | 0.28 |
| TBP [T00794]                | -32 | -23 | TCTATATAAA   | 1.87 |
| FOXP3 [T04280]              | -27 | -22 | ATAAAC       | 9.51 |
| AR [T00040]                 | -24 | -16 | AACGTGTCC    | 8.33 |
| TFII-I [T00824]             | -21 | -16 | GTGTCC       | 9.51 |
| NF-1 [T00539]               | -11 | -4  | TGGGCCAA     | 0.00 |
| Pax-5 [T00070]              | -10 | -4  | GGGCCAA      | 9.55 |
| p53 [T00671]                | -10 | -4  | GGGCCAA      | 6.10 |

C/EBPbeta [T00581]

-7

-4

CCAA

1.64

---
